# Supplementary material
Source: PubMed Central journal article supplement (PMC9888532)
Supplement: tg1c00018_si_001.pdf [file tg1c00018_si_001.pdf]

# SUPPORTING INFORMATION

## Toward High-Throughput Cryogenic IR Fingerprinting of Mobility-Separated Glycan Isomers

Stephan Warnke, Ahmed Ben Faleh, and Thomas R. Rizzo\*

Laboratoire de Chimie Physique Moléculaire, École Polytechnique Fédérale de Lausanne, EPFL SB ISIC LCPM, Station 6, CH-1025 Lausanne, Switzerland.

**KEYWORDS:** cryogenic IR spectroscopy, glycans, glycan analysis, glycomics, high throughput, ion mobility spectrometry

### TYPICAL TIME SEQUENCE USED TO PERFORM THE EXPERIMENTS

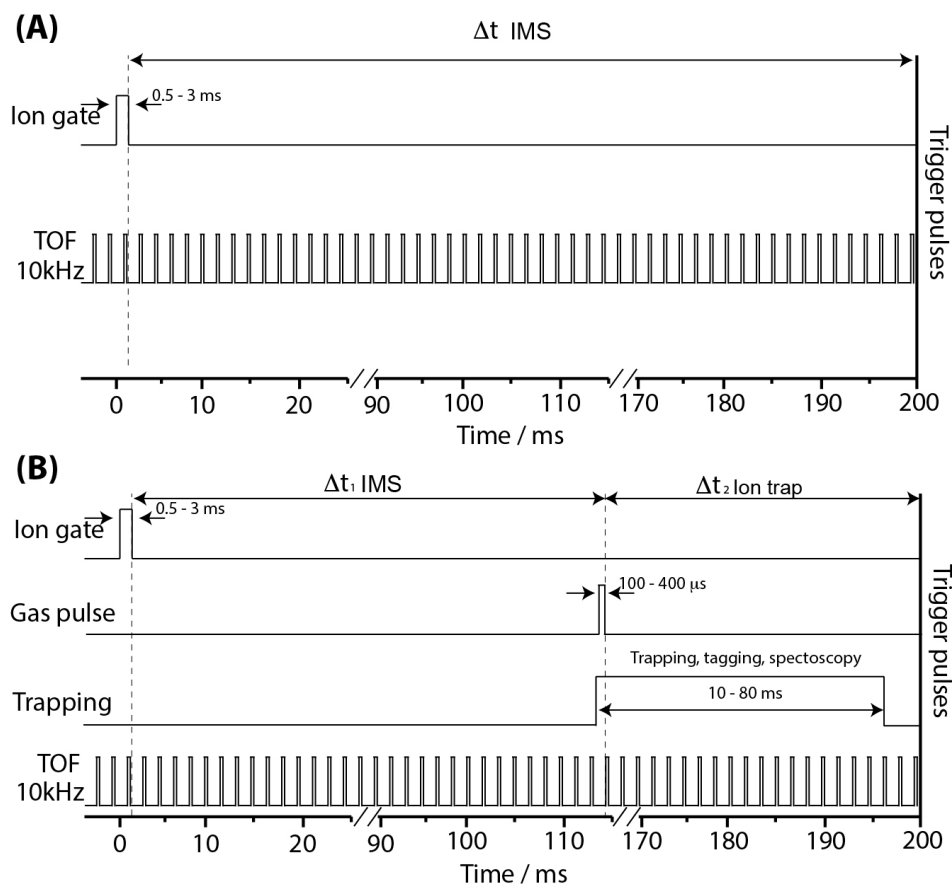

**Figure S1:** Typical time sequence used in SLIM IMS messenger tagging IR spectroscopy experiment using the newly developed instrument. (A) Time sequence diagram when running the instrument in IMS mode only. Ion are separated according to their mobility during almost the whole cycle length. The TOF acquires periodically at a frequency of 10kHz. (B) Time sequence diagram when running in IR spectroscopy mode.  $\Delta t_1$  denotes the separation time on the SLIM module that can be adapted depending upon the considered molecule and the number of separation cycles. The trapping time during

which the ions are tagged and interrogated spectroscopically is denoted by  $\Delta t_2$  and is in the range of tens of milliseconds. The TOF extraction frequency is not drawn to scale.

## MASS SPECTRUM DISPLAYING THE TAGS DISTRIBUTION OF A DISACCHARIDE: ABSORPTION VS. NO ABSORPTION

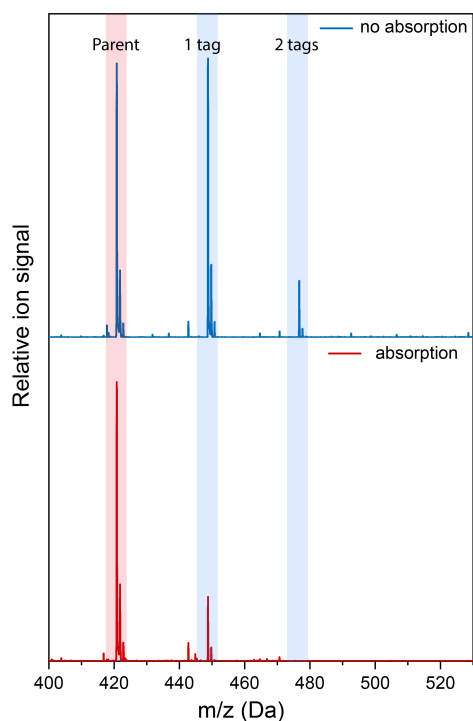

**Figure S2:** Mass spectra of the sodiated GalNac- $\alpha$ (1-3)Gal ions when a resonant photon is absorbed (bottom panel) and when no photon is absorbed (top panel). The peak corresponding to the bare molecules is shown in red and the peaks corresponding the singly tagged ions in blue.

## PCA ANALYSIS WITH REDUCED WAVENUMBER RANGE

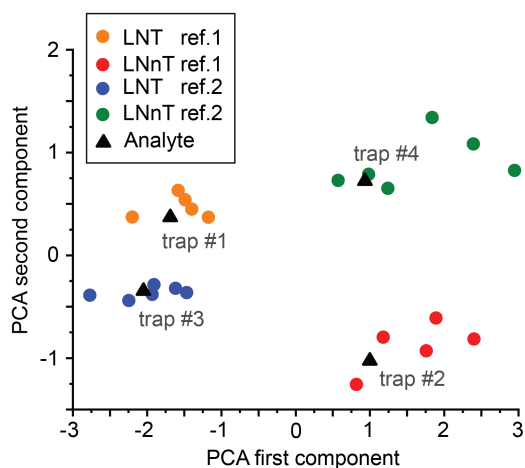

**Figure S3:** First and second principal component after PCA of the IR fingerprint spectra shown in Fig. 4 in the main manuscript. PCA was applied over a reduced wavenumber range of  $100\text{ cm}^{-1}$ , from  $3600\text{ cm}^{-1}$  to  $3700\text{ cm}^{-1}$ . The algorithm automatically groups spectra of the same compound and accurately assigns fingerprints obtained from the four different trap compartments to the reference data.
